# Supplementary material for: Skill of seasonal flow forecasts at catchment scale: an assessment across South Korea
Source: Copernicus journal article supplement (doi:10.5194/hess-28-3261-2024), 2024-07-25
Supplement: Supplementary file 1 [file hess-28-3261-2024-supplement.pdf]

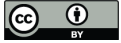

*Supplement of*

## **Skill of seasonal flow forecasts at catchment scale: an assessment across South Korea**

**Yongshin Lee et al.**

*Correspondence to:* Yongshin Lee ([yongshin.lee@bristol.ac.uk](mailto:yongshin.lee@bristol.ac.uk))

The copyright of individual parts of the supplement might differ from the article licence.

# Supplement

## S1. Modified Tank model

The water-balance module suggested by United States Geological Survey (USGS, 2007) is adopted in the modified Tank model. Therefore, when temperature ( $T$ ) is below a specified threshold ( $T_{snow}$ ), the model considers all precipitation ( $P$ ) as snow. In contrast, when temperature is greater than an additional threshold ( $T_{rain}$ ), then all precipitation is considered to be rain. If the temperature is between the  $T_{snow}$  and  $T_{rain}$ , the amount of snow ( $P_{snow}$ ) is linearly interpolated as Eq. S1 and thus  $P_{rain}$  is computed as Eq. S2.

$$P_{snow} = P \times \left[ \frac{T_{rain} - T}{T_{rain} - T_{snow}} \right] \quad (S1)$$

$$P_{rain} = P - P_{snow} \quad (S2)$$

Based on prior research, McCabe and Wolock (1999) proposed a suggested  $T_{rain}$  value of 3.3°C, while the USGS (2007) indicated that  $T_{snow}$  can vary by elevation between -10°C (below 1000 m) and -1°C (above 1000 m).

$P_{snow}$  accumulates as snow storage ( $snostor$ ).

The equation of snow storage that melts (snow melt fraction, SMF) can be expressed as:

$$SMF = \left[ \frac{T - T_{snow}}{T_{rain} - T_{snow}} \right] \times meltmax \quad (S3)$$

Here,  $meltmax$  denotes a maximum melt rate and if the calculated  $SMF$  exceeds  $meltmax$ , it is capped at the value of  $meltmax$ .

The snowmelt (SM), measured in millimeters of snow water equivalent, is subsequently computed using this adjusted SMF.

$$SM = snostor \times SMF \quad (S4)$$

To determine the total precipitation to the soil, the snowmelt ( $SM$ ) is added to the pre-existing precipitation that represents the difference between  $P_{rain}$  and direct runoff.

**Table S1: The description of the parameters in modified Tank model.**

| Parameter | Description                                                          | Parameter | Description                                               |
|-----------|----------------------------------------------------------------------|-----------|-----------------------------------------------------------|
| K1        | Soil moisture exchange coefficient from 2nd to 1st tank              | HA2       | Upper outlet height at first tank                         |
| K2        | Soil moisture exchange coefficient from S1 to S2                     | HB        | Outlet height at 2nd tank                                 |
| A0        | Infiltration coefficient at first tank                               | HC        | Outlet height at 3rd tank                                 |
| A1        | Lower runoff coefficient at first tank (Surface flow)                | U1        | Ordinate of unit hydrograph at t day                      |
| A2        | Upper runoff coefficient at first tank (Surface flow)                | U2        | Ordinate of unit hydrograph at t+1 day                    |
| B0        | Infiltration coefficient at 2 <sup>nd</sup> tank (Intermediate flow) | SNOSTRO   | Size of snow storage                                      |
| B1        | Runoff coefficient at 2nd tank (Intermediate flow)                   | T_RAIN    | Temperature that all precipitation is regarded to be rain |
| C0        | Infiltration coefficient at 3rd tank (Supplemental baseflow)         | T_SNOW    | Temperature that all precipitation is regarded to be snow |
| C1        | Runoff coefficient at 3rd tank (Supplemental baseflow)               | MELTMAX   | Maximum snowmelt rate                                     |
| D1        | Runoff coefficient at fourth tank (Primary baseflow)                 | ALPHA     | Direct runoff fraction                                    |
| HA1       | Lower outlet height at first tank                                    |           |                                                           |

26 **S2. Supplementary results**

27

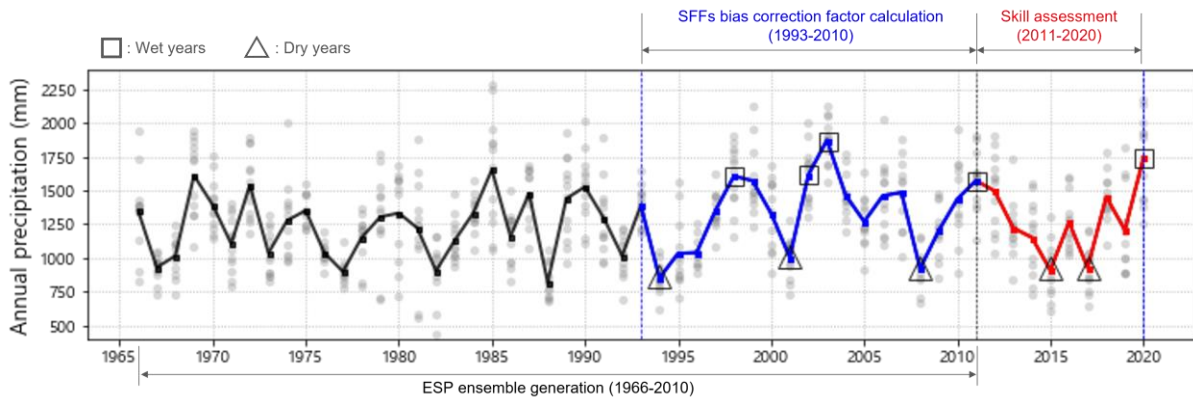

28

29 **Figure S1: Observed annual precipitation (dots) from 1966 to 2020 in the 12 catchments feeding the reservoirs**  
 30 **considered in this study. The solid line represents the mean annual precipitation over the 12 catchments. The red line**  
 31 **represents the period for assessing the seasonal flow forecasts (2011–2020), and the blue line represents the period**  
 32 **used to compute the bias correction factors (1993–2010). ESP ensembles are generated using observed data from 1966**  
 33 **to 2010.**

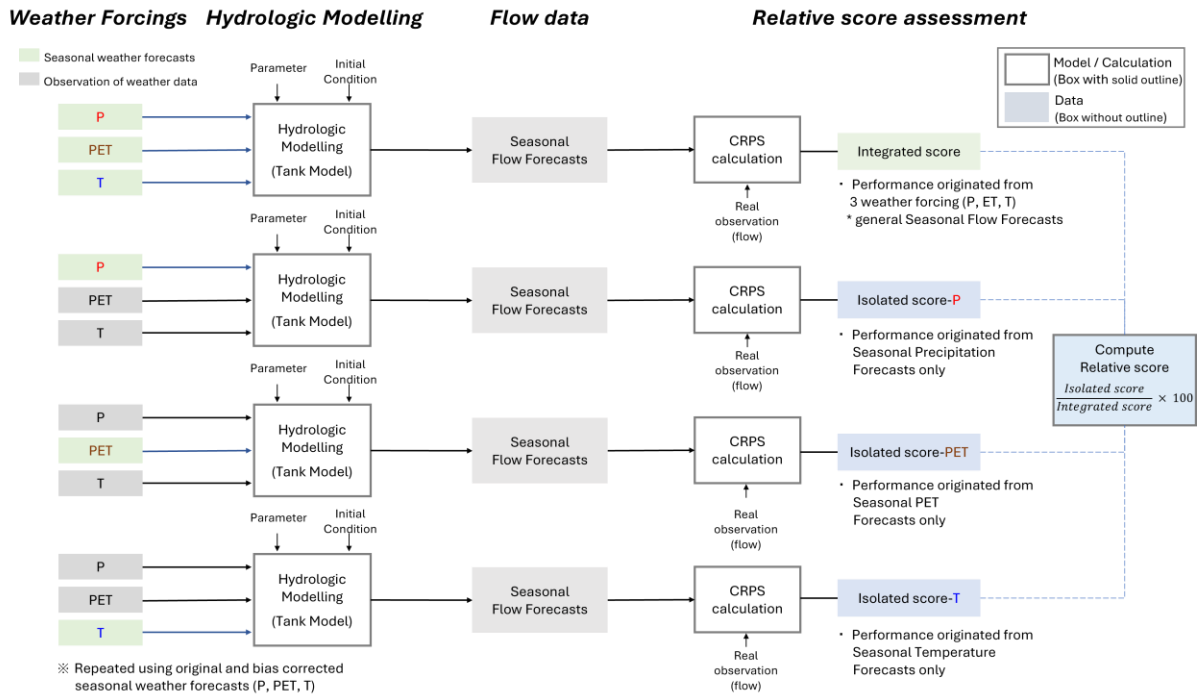

34

35 **Figure S2: Schematic diagram for calculating the relative scores. The integrated score is computed using seasonal**  
 36 **weather forecasts data (green) for precipitation (P), potential evapotranspiration (PET), and temperature (T). The**  
 37 **isolated score for each variable is computed using seasonal weather forecasts data for the variable and observation**  
 38 **data (gray) for the other two variables. The relative score is calculated using the isolated and the integrated score.**

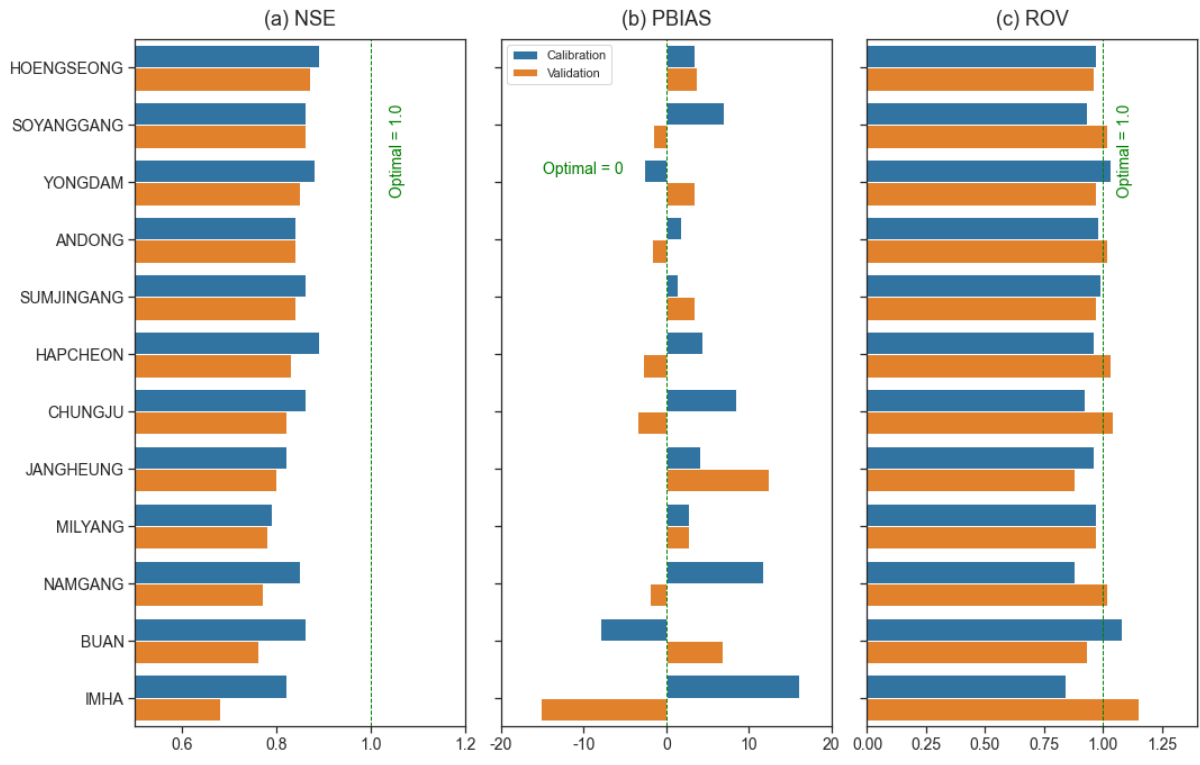

39

40  
41  
42

**Figure S3: The performance of modified Tank model ((a) NSE, (b) PBIAS, (c) ROV) for 12 catchments (y-axis, largest to smallest catchment from the top to bottom) over the model calibration (2001-2010, blue) and validation (2011-2020, orange) period.**

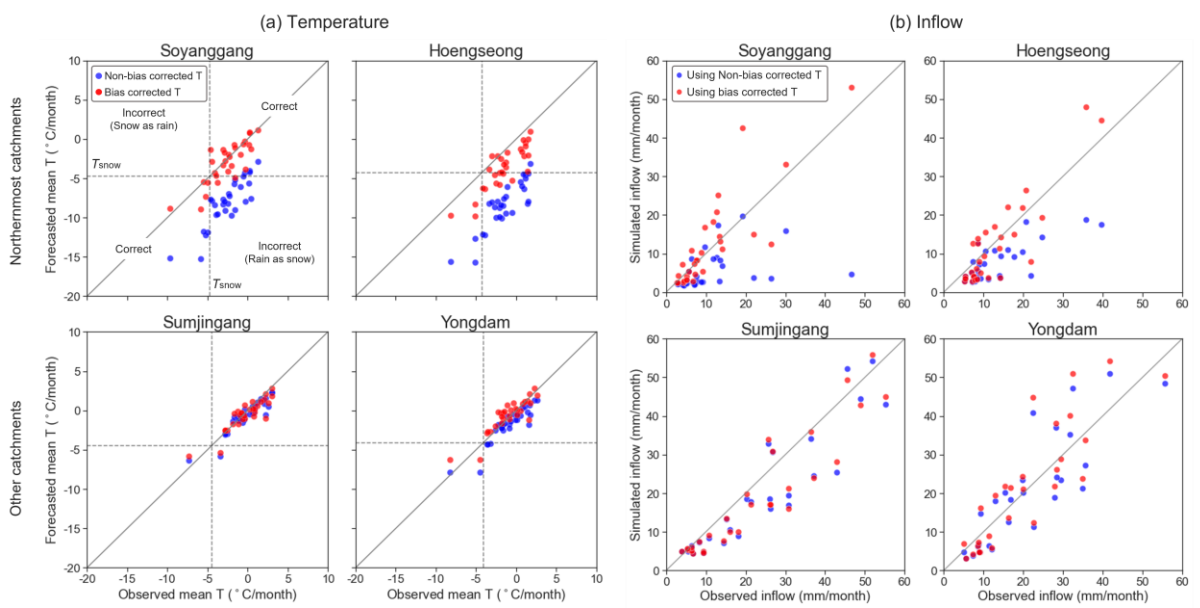

43

44  
45  
46  
47

**Figure S4: (a) Correlation between observed (x-axis) and forecasted (y-axis) monthly mean temperature before (blue dots) and after (red dots) bias correction during the dry season (December-February) in the two northernmost (first row) and two catchments in other regions (second row). In figure (b), the blue (red) dots represent the simulated inflow using observed precipitation, PET and forecasted temperature before (after) bias correction.**

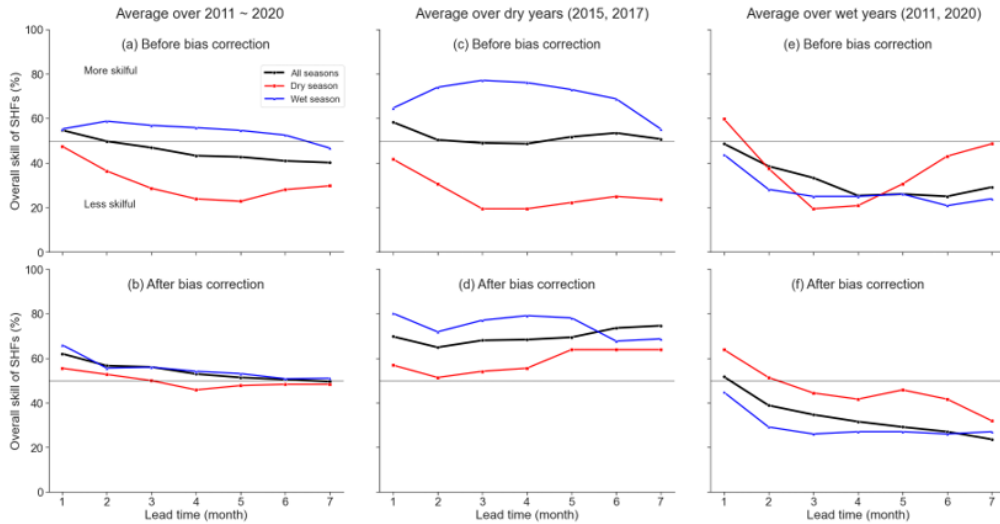

48

49 **Figure S5: Overall skill over 12 catchments, before (first row) and after bias correction (second row) averaged over (a,**  
 50 **b) entire years (2011 to 2020), (c, d) dry years (2015, 2017) and (e, f) wet years (2011, 2020) during all seasons (black**  
 51 **lines), dry seasons (red lines) and wet seasons (blue lines).**

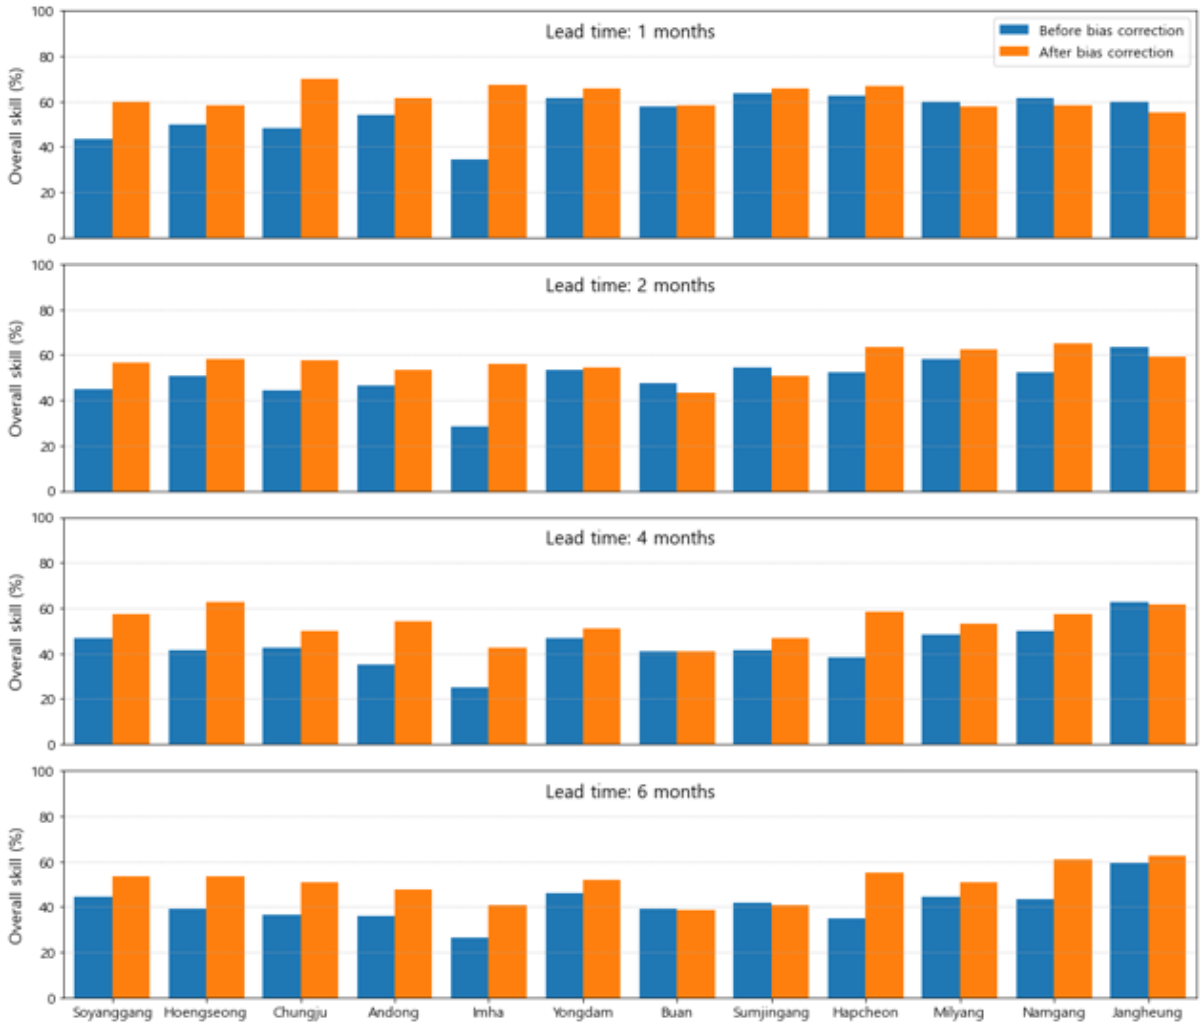

52

53 **Figure S6: Overall skill at lead times of 1, 2, 4, 6 months (from top to bottom) for each catchment before (blue bar) and**  
 54 **after bias correction (orange bar) of weather forcings (P, T and PET).**

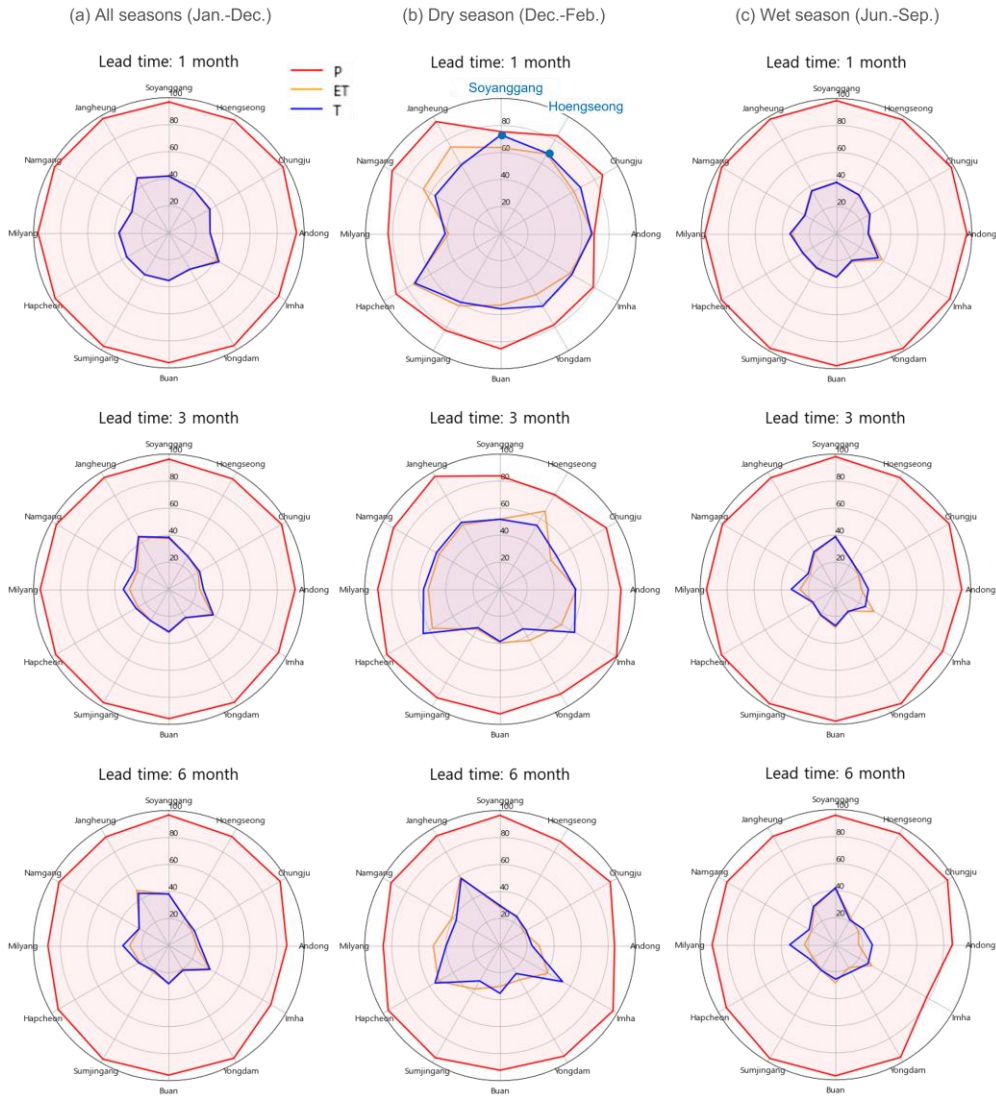

55

56 **Figure S7: Relative score (%) of each weather forcings (Precipitation: red, PET: orange, Temperature: blue) after**  
 57 **bias correction to the score of SFFs averaged over 10 years (2011-2020) during (a) all seasons, (b) dry and (c) wet**  
 58 **season at 1, 3 and 6 lead months from the top to bottom (Catchments are ordered by their location from the**  
 59 **northernmost (Soyonggang) to the southernmost (Jangheung) in right-angle direction).**

|                          | Lead time  | (a) Average over 2011 – 2020 |    |    |    |    |    |    | (b) Average over dry years (2015, 2017) |    |    |    |    |    |    | (c) Average over wet years (2011, 2020) |    |    |    |    |    |    |
|--------------------------|------------|------------------------------|----|----|----|----|----|----|-----------------------------------------|----|----|----|----|----|----|-----------------------------------------|----|----|----|----|----|----|
|                          |            | 1                            | 2  | 3  | 4  | 5  | 6  | 7  | 1                                       | 2  | 3  | 4  | 5  | 6  | 7  | 1                                       | 2  | 3  | 4  | 5  | 6  | 7  |
| North<br>↑<br>↓<br>South | Soyonggang | 7                            | 7  | 6  | 4  | 4  | 4  | 7  | 11                                      | 8  | 10 | 9  | 9  | 11 | 10 | 8                                       | 11 | 6  | 4  | 4  | 3  | 2  |
|                          | Hoengseong | 8                            | 5  | 5  | 1  | 6  | 4  | 3  | 5                                       | 3  | 5  | 6  | 6  | 7  | 5  | 2                                       | 1  | 4  | 1  | 4  | 6  | 6  |
|                          | Chungju    | 1                            | 6  | 9  | 9  | 7  | 7  | 6  | 1                                       | 8  | 12 | 11 | 9  | 7  | 6  | 2                                       | 5  | 2  | 4  | 2  | 3  | 2  |
|                          | Andong     | 6                            | 10 | 8  | 6  | 8  | 9  | 9  | 5                                       | 6  | 2  | 2  | 1  | 3  | 3  | 11                                      | 5  | 1  | 3  | 7  | 8  | 10 |
|                          | Imha       | 2                            | 8  | 11 | 11 | 11 | 10 | 11 | 5                                       | 7  | 10 | 9  | 11 | 7  | 9  | 5                                       | 5  | 8  | 9  | 8  | 7  | 6  |
|                          | Yongdam    | 4                            | 9  | 6  | 8  | 9  | 6  | 8  | 3                                       | 8  | 7  | 8  | 8  | 6  | 6  | 10                                      | 11 | 8  | 7  | 10 | 8  | 10 |
|                          | Buan       | 8                            | 12 | 12 | 12 | 12 | 12 | 12 | 3                                       | 12 | 8  | 11 | 12 | 12 | 12 | 11                                      | 10 | 12 | 12 | 10 | 11 | 8  |
|                          | Sumjingang | 4                            | 11 | 10 | 10 | 10 | 10 | 9  | 5                                       | 11 | 8  | 7  | 6  | 10 | 10 | 1                                       | 9  | 11 | 11 | 10 | 12 | 10 |
|                          | Hapcheon   | 3                            | 2  | 3  | 3  | 3  | 3  | 4  | 1                                       | 3  | 2  | 1  | 1  | 1  | 1  | 5                                       | 3  | 8  | 9  | 8  | 8  | 9  |
|                          | Milyang    | 11                           | 3  | 4  | 7  | 4  | 7  | 5  | 9                                       | 2  | 2  | 2  | 1  | 4  | 6  | 2                                       | 1  | 2  | 6  | 4  | 3  | 2  |
| Namgang                  | 8          | 1                            | 1  | 4  | 2  | 2  | 2  | 10 | 1                                       | 1  | 2  | 4  | 2  | 2  | 8  | 3                                       | 4  | 7  | 3  | 1  | 2  |    |
| Jangheung                | 12         | 4                            | 1  | 2  | 1  | 1  | 1  | 12 | 3                                       | 6  | 5  | 5  | 4  | 3  | 5  | 8                                       | 6  | 2  | 1  | 1  | 1  |    |

60

61 **Figure S8: Overall skill ranks for each catchment averaged over (a) entire years (2011 to 2020), (b) dry years (2015,**  
 62 **2017) and (c) wet years (2011, 2020) for all seasons (January to December). The catchments are arranged from the top**  
 63 **to bottom in order of their location from the northernmost (Soyonggang) to the southernmost (Jangheung). The three**  
 64 **most (least) skilful reservoirs are highlighted in yellow (pink) colour.**

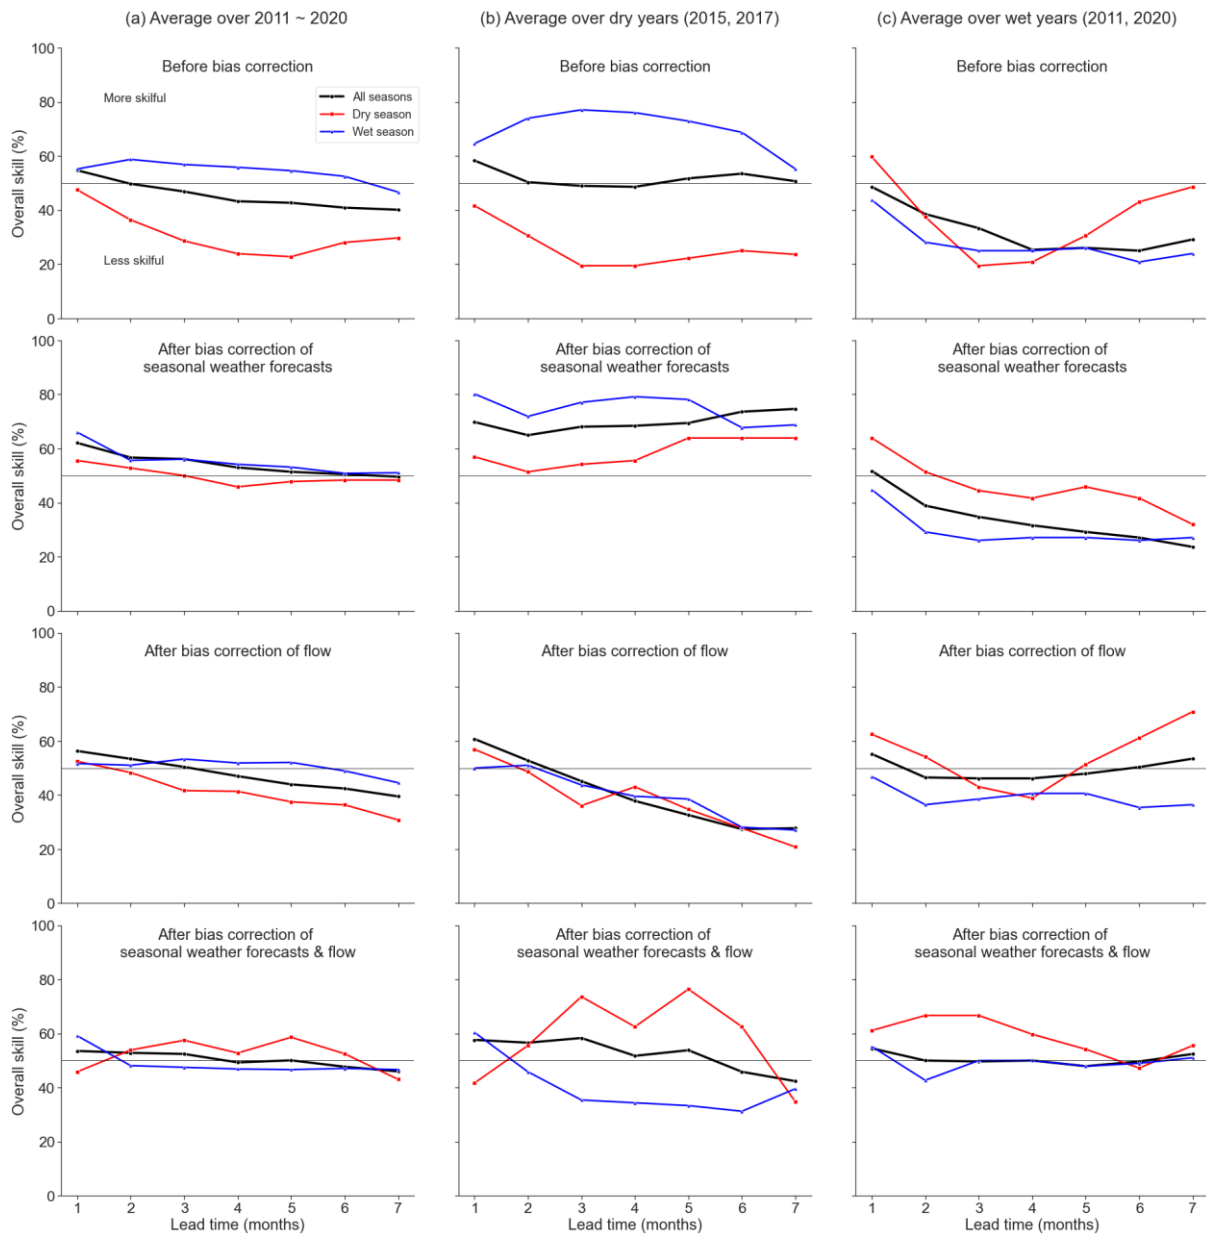

65

66 Figure S9: Overall skill (y-axis) averaged over 12 catchments for 10 years (2011 to 2020) at lead times (x-axis) during  
 67 (a) entire years, (b) dry years (2015, 2017) and (c) wet years (2011, 2020). Each row from the top to bottom represents  
 68 before bias correction, after bias correction of seasonal weather forecasts, flow and both, respectively.

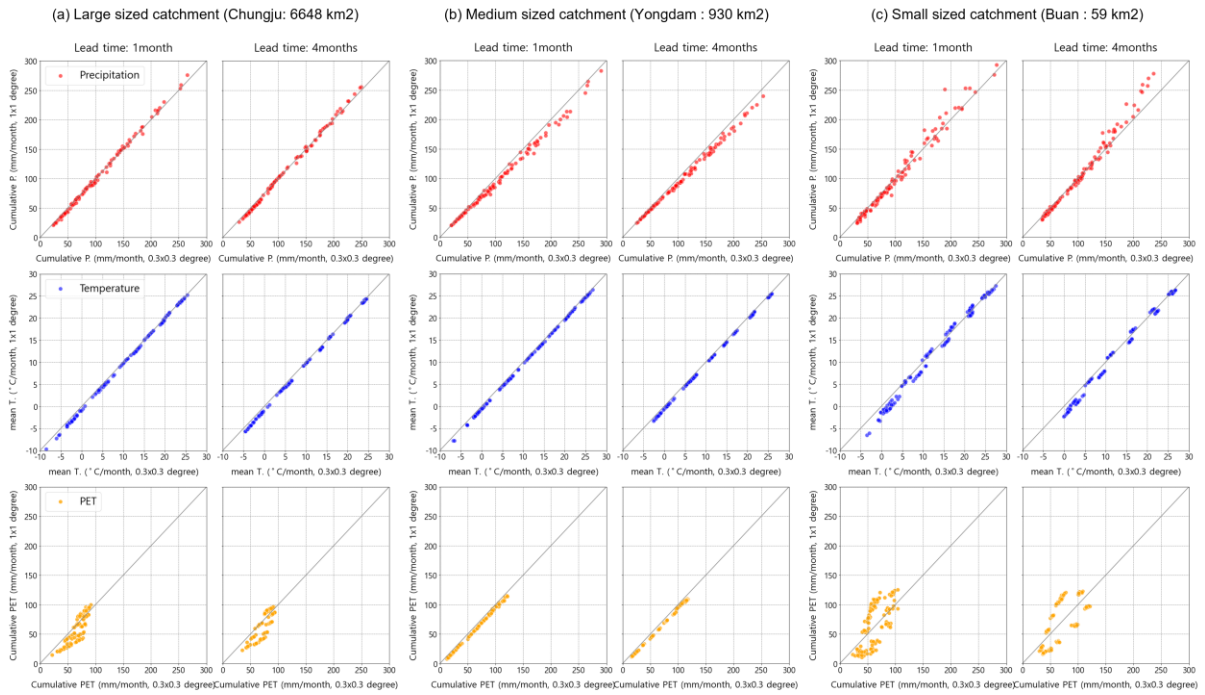

69

70 **Figure S10: Comparison between mean monthly weather forecasts of the high resolution product (0.3x0.3° or**  
 71 **36x36km, on x-axis) and low resolution (1x1°, y-axis) (first row: precipitation, second row: temperature, third row:**  
 72 **PET) at 1- and 4-month lead times from 2011 to 2020. Analysis is repeated in three catchments: (a) large-size**  
 73 **(Chungju), (b) medium (Yongdam) and (c) small (Buan).**
